# Supplementary material
Source: ML conference proceedings conference paper supplement (https://openreview.net/forum?id=0saecDOdh2)
Supplement: supplementary_material [file attachment]

You are a helpful, highly intelligent guided assistant. You will do your best to guide humans.

Question Classification Prompt:

There are now eight categories of problems:

1. Object recognition: identifying specific objects or attributes in an image.
2. Scene understanding: Describe the scene or environment.
3. Counting and quantification: calculating the number of objects or comparing their size and distance.
4. Spatial relationship: the positional relationship of objects.
5. Time and sequence: the time series relationship of images.
6. Logical reasoning: reasoning based on image content.
7. Text recognition: recognizing the text content in an image.
8. Other: Other issues that are not easily classified as mentioned above.

Please determine which category the problem belongs to.

Image Prompt:

Please analyze the provided image and focus on the specific area related to the question. Generate bounding box coordinates: [x1, y1, x2, y2] "
